# Supplementary material for: Primary School Pupils: Unequal GMC Developmental Pathways in a Single School Year
Source: MDPI journal article supplement (doi:10.3390/children9070964), 2022-06-28
Supplement: s1 [file s1]

**Table S1.** Number of children, mean age ( $\pm$ standard deviation) and mean score ( $\pm$ standard deviation) at T0 and T1 per grade, gender, and proficiency level for the walking backwards test.

|              | Grade | Overall group |                |             |             | 'Low scores' category |                |            |             | 'Average scores' category |                |            |             | 'High scores' category |                |             |             |
|--------------|-------|---------------|----------------|-------------|-------------|-----------------------|----------------|------------|-------------|---------------------------|----------------|------------|-------------|------------------------|----------------|-------------|-------------|
|              |       | N             | Age            | T0          | T1          | N                     | Age            | T0         | T1          | N                         | Age            | T0         | T1          | N                      | Age            | T0          | T1          |
| <i>Total</i> | 3rd   | 382           | 6.5 $\pm$ 0.5  | 25 $\pm$ 11 | 29 $\pm$ 11 | 61                    | 6.5 $\pm$ 0.5  | 10 $\pm$ 3 | 19 $\pm$ 7  | 248                       | 6.5 $\pm$ 0.5  | 24 $\pm$ 6 | 29 $\pm$ 10 | 73                     | 6.6 $\pm$ 0.5  | 41 $\pm$ 10 | 35 $\pm$ 11 |
|              | 4th   | 422           | 7.6 $\pm$ 0.5  | 29 $\pm$ 11 | 34 $\pm$ 13 | 65                    | 7.6 $\pm$ 0.6  | 13 $\pm$ 4 | 23 $\pm$ 10 | 283                       | 7.6 $\pm$ 0.5  | 29 $\pm$ 7 | 33 $\pm$ 12 | 74                     | 7.7 $\pm$ 0.5  | 46 $\pm$ 6  | 45 $\pm$ 10 |
|              | 5th   | 425           | 8.6 $\pm$ 0.5  | 34 $\pm$ 12 | 40 $\pm$ 13 | 72                    | 8.4 $\pm$ 0.4  | 17 $\pm$ 4 | 30 $\pm$ 10 | 278                       | 8.6 $\pm$ 0.5  | 33 $\pm$ 6 | 40 $\pm$ 12 | 75                     | 8.6 $\pm$ 0.5  | 52 $\pm$ 4  | 52 $\pm$ 9  |
|              | 6th   | 440           | 9.6 $\pm$ 0.5  | 39 $\pm$ 13 | 45 $\pm$ 13 | 74                    | 9.6 $\pm$ 0.5  | 20 $\pm$ 5 | 32 $\pm$ 11 | 291                       | 9.6 $\pm$ 0.4  | 39 $\pm$ 7 | 45 $\pm$ 11 | 75                     | 9.5 $\pm$ 0.5  | 57 $\pm$ 7  | 58 $\pm$ 10 |
|              | 7th   | 474           | 10.6 $\pm$ 0.5 | 41 $\pm$ 13 | 45 $\pm$ 13 | 72                    | 10.5 $\pm$ 0.5 | 20 $\pm$ 6 | 31 $\pm$ 10 | 314                       | 10.6 $\pm$ 0.5 | 41 $\pm$ 8 | 46 $\pm$ 11 | 88                     | 10.5 $\pm$ 0.5 | 59 $\pm$ 6  | 56 $\pm$ 11 |
|              | 8th   | 451           | 11.6 $\pm$ 0.5 | 44 $\pm$ 13 | 48 $\pm$ 13 | 78                    | 11.7 $\pm$ 0.6 | 24 $\pm$ 6 | 33 $\pm$ 11 | 293                       | 11.6 $\pm$ 0.5 | 45 $\pm$ 7 | 49 $\pm$ 11 | 80                     | 11.5 $\pm$ 0.4 | 62 $\pm$ 5  | 60 $\pm$ 9  |
| <i>Boys</i>  | 3rd   | 170           | 6.5 $\pm$ 0.5  | 22 $\pm$ 10 | 26 $\pm$ 10 | 29                    | 6.4 $\pm$ 0.5  | 9 $\pm$ 2  | 18 $\pm$ 7  | 106                       | 6.5 $\pm$ 0.5  | 21 $\pm$ 6 | 27 $\pm$ 10 | 35                     | 6.6 $\pm$ 0.5  | 37 $\pm$ 7  | 32 $\pm$ 9  |
|              | 4th   | 232           | 7.6 $\pm$ 0.4  | 27 $\pm$ 11 | 31 $\pm$ 12 | 36                    | 7.6 $\pm$ 0.6  | 11 $\pm$ 2 | 22 $\pm$ 9  | 156                       | 7.6 $\pm$ 0.4  | 26 $\pm$ 6 | 30 $\pm$ 10 | 40                     | 7.7 $\pm$ 0.4  | 43 $\pm$ 5  | 44 $\pm$ 9  |
|              | 5th   | 209           | 8.6 $\pm$ 0.4  | 32 $\pm$ 12 | 38 $\pm$ 14 | 39                    | 8.4 $\pm$ 0.4  | 17 $\pm$ 4 | 28 $\pm$ 11 | 135                       | 8.6 $\pm$ 0.4  | 31 $\pm$ 6 | 37 $\pm$ 12 | 35                     | 8.5 $\pm$ 0.5  | 51 $\pm$ 5  | 53 $\pm$ 9  |
|              | 6th   | 211           | 9.6 $\pm$ 0.5  | 35 $\pm$ 12 | 42 $\pm$ 12 | 37                    | 9.6 $\pm$ 0.7  | 18 $\pm$ 4 | 29 $\pm$ 10 | 138                       | 9.6 $\pm$ 0.4  | 35 $\pm$ 7 | 42 $\pm$ 11 | 33                     | 9.6 $\pm$ 0.6  | 52 $\pm$ 5  | 54 $\pm$ 9  |
|              | 7th   | 217           | 10.6 $\pm$ 0.5 | 38 $\pm$ 12 | 42 $\pm$ 12 | 33                    | 10.5 $\pm$ 0.5 | 18 $\pm$ 4 | 28 $\pm$ 8  | 143                       | 10.7 $\pm$ 0.6 | 38 $\pm$ 6 | 43 $\pm$ 10 | 41                     | 10.5 $\pm$ 0.5 | 54 $\pm$ 5  | 51 $\pm$ 11 |
|              | 8th   | 208           | 11.6 $\pm$ 0.5 | 41 $\pm$ 13 | 45 $\pm$ 14 | 37                    | 11.7 $\pm$ 0.6 | 21 $\pm$ 4 | 30 $\pm$ 9  | 132                       | 11.6 $\pm$ 0.5 | 42 $\pm$ 7 | 46 $\pm$ 11 | 39                     | 11.5 $\pm$ 0.4 | 59 $\pm$ 5  | 57 $\pm$ 10 |
| <i>Girls</i> | 3rd   | 212           | 6.5 $\pm$ 0.4  | 27 $\pm$ 12 | 31 $\pm$ 11 | 32                    | 6.5 $\pm$ 0.5  | 11 $\pm$ 4 | 19 $\pm$ 7  | 142                       | 6.4 $\pm$ 0.4  | 26 $\pm$ 6 | 31 $\pm$ 10 | 38                     | 6.6 $\pm$ 0.5  | 45 $\pm$ 10 | 38 $\pm$ 11 |
|              | 4th   | 190           | 7.6 $\pm$ 0.5  | 32 $\pm$ 12 | 36 $\pm$ 13 | 29                    | 7.6 $\pm$ 0.6  | 14 $\pm$ 5 | 24 $\pm$ 11 | 127                       | 7.6 $\pm$ 0.5  | 31 $\pm$ 6 | 37 $\pm$ 12 | 34                     | 7.7 $\pm$ 0.6  | 49 $\pm$ 5  | 45 $\pm$ 12 |
|              | 5th   | 216           | 8.6 $\pm$ 0.5  | 36 $\pm$ 11 | 43 $\pm$ 12 | 33                    | 8.4 $\pm$ 0.4  | 18 $\pm$ 4 | 33 $\pm$ 9  | 143                       | 8.6 $\pm$ 0.6  | 35 $\pm$ 6 | 42 $\pm$ 11 | 40                     | 8.6 $\pm$ 0.5  | 53 $\pm$ 4  | 52 $\pm$ 10 |
|              | 6th   | 229           | 9.6 $\pm$ 0.4  | 42 $\pm$ 13 | 48 $\pm$ 13 | 37                    | 9.5 $\pm$ 0.4  | 22 $\pm$ 5 | 34 $\pm$ 12 | 153                       | 9.5 $\pm$ 0.4  | 42 $\pm$ 7 | 48 $\pm$ 11 | 39                     | 9.5 $\pm$ 0.5  | 61 $\pm$ 5  | 61 $\pm$ 9  |
|              | 7th   | 257           | 10.5 $\pm$ 0.5 | 44 $\pm$ 14 | 48 $\pm$ 13 | 39                    | 10.5 $\pm$ 0.5 | 22 $\pm$ 7 | 34 $\pm$ 12 | 171                       | 10.6 $\pm$ 0.5 | 43 $\pm$ 8 | 48 $\pm$ 11 | 47                     | 10.6 $\pm$ 0.5 | 62 $\pm$ 4  | 59 $\pm$ 9  |
|              | 8th   | 243           | 11.6 $\pm$ 0.5 | 47 $\pm$ 13 | 50 $\pm$ 12 | 41                    | 11.6 $\pm$ 0.5 | 27 $\pm$ 5 | 37 $\pm$ 11 | 161                       | 11.7 $\pm$ 0.6 | 47 $\pm$ 7 | 51 $\pm$ 10 | 41                     | 11.5 $\pm$ 0.4 | 65 $\pm$ 4  | 63 $\pm$ 7  |

**Table S2.** Number of children, mean age ( $\pm$ standard deviation) and mean score ( $\pm$ standard deviation) at T0 and T1 per grade, gender, and proficiency level for the moving sideways test.

|              | Grade | Overall group |                |            |            | 'Low scores' category |                |            |            | 'Average scores' category |                |            |            | 'High scores' category |                |            |            |
|--------------|-------|---------------|----------------|------------|------------|-----------------------|----------------|------------|------------|---------------------------|----------------|------------|------------|------------------------|----------------|------------|------------|
|              |       | N             | Age            | T0         | T1         | N                     | Age            | T0         | T1         | N                         | Age            | T0         | T1         | N                      | Age            | T0         | T1         |
| <i>Total</i> | 3rd   | 382           | 6.5 $\pm$ 0.5  | 31 $\pm$ 6 | 31 $\pm$ 8 | 61                    | 6.4 $\pm$ 0.4  | 21 $\pm$ 2 | 26 $\pm$ 7 | 239                       | 6.5 $\pm$ 0.5  | 31 $\pm$ 3 | 30 $\pm$ 7 | 82                     | 6.6 $\pm$ 0.5  | 39 $\pm$ 3 | 37 $\pm$ 7 |
|              | 4th   | 422           | 7.6 $\pm$ 0.5  | 36 $\pm$ 7 | 38 $\pm$ 8 | 70                    | 7.5 $\pm$ 0.4  | 26 $\pm$ 3 | 32 $\pm$ 8 | 249                       | 7.6 $\pm$ 0.5  | 35 $\pm$ 3 | 38 $\pm$ 7 | 103                    | 7.7 $\pm$ 0.5  | 44 $\pm$ 3 | 44 $\pm$ 7 |
|              | 5th   | 425           | 8.6 $\pm$ 0.5  | 39 $\pm$ 7 | 43 $\pm$ 8 | 71                    | 8.6 $\pm$ 0.4  | 27 $\pm$ 3 | 35 $\pm$ 8 | 270                       | 8.6 $\pm$ 0.5  | 39 $\pm$ 4 | 43 $\pm$ 6 | 84                     | 8.6 $\pm$ 0.4  | 49 $\pm$ 3 | 49 $\pm$ 6 |
|              | 6th   | 440           | 9.6 $\pm$ 0.6  | 43 $\pm$ 8 | 46 $\pm$ 8 | 72                    | 9.6 $\pm$ 0.6  | 31 $\pm$ 4 | 39 $\pm$ 6 | 284                       | 9.6 $\pm$ 0.4  | 43 $\pm$ 4 | 46 $\pm$ 7 | 84                     | 9.5 $\pm$ 0.4  | 54 $\pm$ 4 | 51 $\pm$ 8 |
|              | 7th   | 474           | 10.6 $\pm$ 0.5 | 45 $\pm$ 8 | 48 $\pm$ 8 | 77                    | 10.5 $\pm$ 0.5 | 33 $\pm$ 4 | 41 $\pm$ 7 | 298                       | 10.6 $\pm$ 0.5 | 45 $\pm$ 4 | 48 $\pm$ 7 | 99                     | 10.6 $\pm$ 0.5 | 55 $\pm$ 3 | 55 $\pm$ 8 |
|              | 8th   | 451           | 11.6 $\pm$ 0.5 | 47 $\pm$ 9 | 51 $\pm$ 9 | 78                    | 11.7 $\pm$ 0.6 | 34 $\pm$ 4 | 42 $\pm$ 8 | 293                       | 11.6 $\pm$ 0.5 | 47 $\pm$ 4 | 51 $\pm$ 7 | 80                     | 11.6 $\pm$ 0.5 | 60 $\pm$ 5 | 59 $\pm$ 7 |
| <i>Boys</i>  | 3rd   | 170           | 6.5 $\pm$ 0.5  | 31 $\pm$ 6 | 32 $\pm$ 9 | 28                    | 6.5 $\pm$ 0.4  | 21 $\pm$ 3 | 26 $\pm$ 8 | 109                       | 6.5 $\pm$ 0.5  | 31 $\pm$ 3 | 31 $\pm$ 7 | 33                     | 6.6 $\pm$ 0.5  | 40 $\pm$ 2 | 39 $\pm$ 7 |
|              | 4th   | 232           | 7.6 $\pm$ 0.4  | 36 $\pm$ 7 | 39 $\pm$ 8 | 36                    | 7.6 $\pm$ 0.5  | 26 $\pm$ 3 | 32 $\pm$ 7 | 144                       | 7.6 $\pm$ 0.4  | 35 $\pm$ 3 | 38 $\pm$ 7 | 52                     | 7.7 $\pm$ 0.5  | 44 $\pm$ 4 | 45 $\pm$ 7 |
|              | 5th   | 209           | 8.6 $\pm$ 0.4  | 39 $\pm$ 8 | 43 $\pm$ 9 | 36                    | 8.6 $\pm$ 0.4  | 27 $\pm$ 4 | 33 $\pm$ 8 | 128                       | 8.6 $\pm$ 0.5  | 39 $\pm$ 3 | 43 $\pm$ 6 | 45                     | 8.6 $\pm$ 0.4  | 49 $\pm$ 3 | 51 $\pm$ 5 |
|              | 6th   | 211           | 9.6 $\pm$ 0.5  | 43 $\pm$ 9 | 46 $\pm$ 9 | 32                    | 9.7 $\pm$ 0.7  | 30 $\pm$ 3 | 39 $\pm$ 6 | 140                       | 9.6 $\pm$ 0.4  | 43 $\pm$ 5 | 46 $\pm$ 8 | 39                     | 9.5 $\pm$ 0.5  | 55 $\pm$ 4 | 52 $\pm$ 9 |
|              | 7th   | 217           | 10.6 $\pm$ 0.5 | 45 $\pm$ 8 | 49 $\pm$ 8 | 35                    | 10.6 $\pm$ 0.5 | 32 $\pm$ 4 | 41 $\pm$ 8 | 139                       | 10.6 $\pm$ 0.5 | 45 $\pm$ 4 | 49 $\pm$ 7 | 43                     | 10.6 $\pm$ 0.5 | 55 $\pm$ 3 | 55 $\pm$ 7 |
|              | 8th   | 208           | 11.6 $\pm$ 0.5 | 47 $\pm$ 9 | 51 $\pm$ 9 | 34                    | 11.7 $\pm$ 0.6 | 34 $\pm$ 5 | 42 $\pm$ 6 | 139                       | 11.5 $\pm$ 0.5 | 47 $\pm$ 4 | 51 $\pm$ 7 | 35                     | 11.6 $\pm$ 0.4 | 61 $\pm$ 4 | 59 $\pm$ 8 |
| <i>Girls</i> | 3rd   | 212           | 6.5 $\pm$ 0.4  | 31 $\pm$ 6 | 31 $\pm$ 8 | 33                    | 6.4 $\pm$ 0.4  | 21 $\pm$ 2 | 27 $\pm$ 7 | 130                       | 6.5 $\pm$ 0.5  | 30 $\pm$ 3 | 30 $\pm$ 7 | 49                     | 6.6 $\pm$ 0.5  | 39 $\pm$ 3 | 36 $\pm$ 7 |
|              | 4th   | 190           | 7.6 $\pm$ 0.5  | 35 $\pm$ 6 | 38 $\pm$ 8 | 34                    | 7.5 $\pm$ 0.3  | 25 $\pm$ 3 | 31 $\pm$ 7 | 105                       | 7.6 $\pm$ 0.5  | 35 $\pm$ 3 | 38 $\pm$ 7 | 51                     | 7.7 $\pm$ 0.6  | 43 $\pm$ 3 | 43 $\pm$ 7 |
|              | 5th   | 216           | 8.6 $\pm$ 0.5  | 39 $\pm$ 7 | 43 $\pm$ 7 | 35                    | 8.5 $\pm$ 0.5  | 27 $\pm$ 3 | 37 $\pm$ 6 | 142                       | 8.6 $\pm$ 0.6  | 39 $\pm$ 4 | 43 $\pm$ 7 | 39                     | 8.6 $\pm$ 0.5  | 49 $\pm$ 3 | 47 $\pm$ 6 |
|              | 6th   | 229           | 9.5 $\pm$ 0.4  | 43 $\pm$ 8 | 46 $\pm$ 8 | 40                    | 9.5 $\pm$ 0.4  | 31 $\pm$ 5 | 39 $\pm$ 6 | 144                       | 9.5 $\pm$ 0.4  | 43 $\pm$ 4 | 46 $\pm$ 7 | 45                     | 9.5 $\pm$ 0.3  | 54 $\pm$ 3 | 51 $\pm$ 7 |
|              | 7th   | 257           | 10.5 $\pm$ 0.5 | 45 $\pm$ 8 | 48 $\pm$ 8 | 42                    | 10.5 $\pm$ 0.5 | 33 $\pm$ 3 | 40 $\pm$ 7 | 159                       | 10.6 $\pm$ 0.5 | 45 $\pm$ 4 | 48 $\pm$ 6 | 56                     | 10.5 $\pm$ 0.4 | 56 $\pm$ 4 | 55 $\pm$ 8 |

|     |     |          |      |      |    |          |      |      |     |          |      |      |    |          |      |      |
|-----|-----|----------|------|------|----|----------|------|------|-----|----------|------|------|----|----------|------|------|
| 8th | 243 | 11.6±0.5 | 47±8 | 51±9 | 44 | 11.7±0.6 | 35±4 | 41±9 | 154 | 11.6±0.5 | 47±4 | 51±7 | 45 | 11.6±0.5 | 59±5 | 59±5 |
|-----|-----|----------|------|------|----|----------|------|------|-----|----------|------|------|----|----------|------|------|

**Table S3.** Number of children, mean age (±standard deviation) and mean score (±standard deviation) at T0 and T1 per grade, gender, and proficiency level for the jumping sideways test.

|       |       | Overall group |          |       |       | ‘Low scores’ category |          |      |       | ‘Average scores’ category |          |      |       | ‘High scores’ category |          |      |       |
|-------|-------|---------------|----------|-------|-------|-----------------------|----------|------|-------|---------------------------|----------|------|-------|------------------------|----------|------|-------|
|       | Grade | N             | Age      | T0    | T1    | N                     | Age      | T0   | T1    | N                         | Age      | T0   | T1    | N                      | Age      | T0   | T1    |
| Total | 3rd   | 382           | 6.5±0.5  | 38±10 | 43±12 | 60                    | 6.4±0.4  | 24±3 | 32±8  | 254                       | 6.5±0.5  | 37±6 | 42±9  | 68                     | 6.6±0.5  | 55±5 | 56±8  |
|       | 4th   | 422           | 7.6±0.5  | 46±12 | 51±12 | 71                    | 7.5±0.5  | 30±5 | 40±10 | 277                       | 7.6±0.5  | 46±6 | 50±10 | 74                     | 7.7±0.5  | 64±6 | 65±9  |
|       | 5th   | 425           | 8.6±0.5  | 53±12 | 58±13 | 72                    | 8.4±0.4  | 34±6 | 44±12 | 271                       | 8.6±0.5  | 53±6 | 58±11 | 82                     | 8.7±0.5  | 70±5 | 70±10 |
|       | 6th   | 440           | 9.6±0.6  | 60±13 | 67±14 | 68                    | 9.6±0.6  | 39±5 | 50±12 | 292                       | 9.5±0.4  | 59±7 | 67±11 | 80                     | 9.6±0.5  | 78±6 | 80±11 |
|       | 7th   | 474           | 10.6±0.5 | 64±12 | 70±14 | 79                    | 10.6±0.5 | 46±7 | 55±11 | 310                       | 10.6±0.5 | 64±7 | 69±11 | 85                     | 10.6±0.5 | 82±6 | 84±10 |
|       | 8th   | 451           | 11.6±0.5 | 71±13 | 75±14 | 83                    | 11.7±0.6 | 53±8 | 62±13 | 289                       | 11.6±0.5 | 71±6 | 75±11 | 79                     | 11.6±0.5 | 89±6 | 89±12 |
| Boys  | 3rd   | 170           | 6.5±0.5  | 40±10 | 43±12 | 27                    | 6.5±0.4  | 25±3 | 34±8  | 111                       | 6.5±0.5  | 39±6 | 41±10 | 32                     | 6.6±0.5  | 56±4 | 56±10 |
|       | 4th   | 232           | 7.6±0.4  | 46±12 | 51±13 | 36                    | 7.6±0.5  | 29±4 | 41±10 | 156                       | 7.6±0.5  | 46±6 | 50±11 | 40                     | 7.6±0.3  | 65±7 | 65±10 |
|       | 5th   | 209           | 8.6±0.4  | 53±13 | 57±14 | 35                    | 8.5±0.4  | 33±6 | 41±12 | 134                       | 8.6±0.5  | 53±6 | 59±11 | 40                     | 8.6±0.4  | 70±6 | 69±12 |
|       | 6th   | 211           | 9.6±0.5  | 60±13 | 67±13 | 33                    | 9.6±0.6  | 40±5 | 52±11 | 139                       | 9.6±0.5  | 60±7 | 67±11 | 39                     | 9.6±0.5  | 78±6 | 80±8  |
|       | 7th   | 217           | 10.6±0.5 | 66±12 | 71±13 | 39                    | 10.7±0.6 | 48±6 | 57±12 | 140                       | 10.6±0.5 | 66±6 | 71±10 | 38                     | 10.5±0.5 | 83±4 | 85±8  |
|       | 8th   | 208           | 11.6±0.5 | 71±13 | 76±14 | 39                    | 11.8±0.7 | 52±9 | 63±12 | 132                       | 11.5±0.4 | 72±7 | 77±11 | 37                     | 11.5±0.4 | 90±5 | 90±13 |
| Girls | 3rd   | 212           | 6.5±0.4  | 36±10 | 42±11 | 33                    | 6.4±0.4  | 24±2 | 31±8  | 143                       | 6.5±0.4  | 35±5 | 42±9  | 36                     | 6.6±0.5  | 54±5 | 56±7  |
|       | 4th   | 190           | 7.6±0.5  | 46±11 | 51±12 | 35                    | 7.4±0.3  | 30±6 | 38±9  | 121                       | 7.6±0.5  | 46±6 | 51±9  | 34                     | 7.8±0.6  | 63±5 | 65±7  |
|       | 5th   | 216           | 8.6±0.5  | 53±12 | 59±13 | 37                    | 8.4±0.4  | 34±5 | 46±11 | 137                       | 8.6±0.6  | 52±6 | 58±10 | 42                     | 8.7±0.5  | 69±5 | 71±9  |
|       | 6th   | 229           | 9.5±0.4  | 59±13 | 66±14 | 35                    | 9.6±0.5  | 39±6 | 49±12 | 153                       | 9.5±0.4  | 59±6 | 66±11 | 41                     | 9.6±0.5  | 79±6 | 80±13 |
|       | 7th   | 257           | 10.5±0.5 | 63±13 | 69±14 | 40                    | 10.5±0.5 | 44±6 | 53±10 | 170                       | 10.5±0.5 | 63±6 | 68±10 | 47                     | 10.6±0.6 | 81±7 | 83±12 |
|       | 8th   | 243           | 11.6±0.5 | 71±12 | 74±14 | 44                    | 11.6±0.6 | 53±7 | 60±13 | 157                       | 11.7±0.5 | 71±5 | 74±11 | 42                     | 11.6±0.5 | 88±6 | 88±11 |

**Table S4.** Number of children, mean age (±standard deviation) and mean score (±standard deviation) at T0 and T1 per grade, gender, and proficiency level for the eye hand coordination test.

| Overall group |                 |     |          |       |       | ‘Low scores’ category |          |      |       | ‘Average scores’ category |          |      |       | ‘High scores’ category |          |      |       |
|---------------|-----------------|-----|----------|-------|-------|-----------------------|----------|------|-------|---------------------------|----------|------|-------|------------------------|----------|------|-------|
|               | Grade           | N   | Age      | T0    | T1    | N                     | Age      | T0   | T1    | N                         | Age      | T0   | T1    | N                      | Age      | T0   | T1    |
| Total         | 5 <sup>th</sup> | 425 | 8.6±0.5  | 10±10 | 22±14 | 82                    | 8.4±0.4  | 0±1  | 10±9  | 263                       | 8.5±0.5  | 9±6  | 22±13 | 80                     | 8.7±0.5  | 26±6 | 33±12 |
|               | 6 <sup>th</sup> | 440 | 9.6±0.5  | 18±13 | 25±13 | 73                    | 9.5±0.4  | 2±2  | 11±10 | 288                       | 9.6±0.7  | 16±9 | 24±11 | 79                     | 9.7±0.5  | 38±6 | 37±10 |
|               | 7 <sup>th</sup> | 474 | 10.6±0.5 | 24±14 | 30±14 | 74                    | 10.5±0.5 | 4±3  | 16±11 | 301                       | 10.5±0.5 | 22±9 | 30±12 | 99                     | 10.7±0.5 | 43±7 | 44±11 |
|               | 8 <sup>th</sup> | 451 | 11.6±0.5 | 32±15 | 38±14 | 71                    | 11.6±0.6 | 10±6 | 26±13 | 292                       | 11.6±0.5 | 31±9 | 38±12 | 88                     | 11.6±0.5 | 51±6 | 49±13 |
| Boys          | 5 <sup>th</sup> | 209 | 8.6±0.4  | 13±10 | 25±14 | 37                    | 8.4±0.4  | 1±1  | 14±10 | 132                       | 8.6±0.4  | 12±6 | 24±13 | 40                     | 8.8±0.5  | 29±4 | 36±11 |
|               | 6 <sup>th</sup> | 211 | 9.6±0.5  | 22±13 | 28±12 | 37                    | 9.5±0.4  | 4±2  | 14±10 | 133                       | 9.6±0.5  | 21±8 | 29±9  | 41                     | 9.8±0.6  | 40±5 | 39±12 |
|               | 7 <sup>th</sup> | 217 | 10.6±0.5 | 29±14 | 35±14 | 33                    | 10.6±0.6 | 6±4  | 19±13 | 132                       | 10.6±0.5 | 28±8 | 34±11 | 52                     | 10.6±0.5 | 46±6 | 48±8  |
|               | 8 <sup>th</sup> | 208 | 11.6±0.5 | 36±14 | 42±14 | 33                    | 11.6±0.5 | 14±6 | 28±12 | 135                       | 11.6±0.5 | 36±7 | 42±12 | 40                     | 11.5±0.4 | 54±5 | 54±11 |
| Girls         | 5 <sup>th</sup> | 216 | 8.6±0.5  | 8±9   | 19±14 | 45                    | 8.5±0.5  | 0±0  | 8±7   | 131                       | 8.5±0.6  | 6±4  | 19±13 | 40                     | 8.7±0.5  | 23±5 | 30±14 |
|               | 6 <sup>th</sup> | 229 | 9.5±0.7  | 14±12 | 21±13 | 36                    | 9.4±0.4  | 0±1  | 8±9   | 155                       | 9.5±0.4  | 12±7 | 20±12 | 38                     | 9.5±0.4  | 36±6 | 36±9  |
|               | 7 <sup>th</sup> | 257 | 10.5±0.5 | 19±13 | 27±14 | 41                    | 10.5±0.6 | 2±1  | 13±9  | 169                       | 10.5±0.4 | 18±8 | 26±11 | 47                     | 10.8±0.5 | 40±7 | 39±12 |
|               | 8 <sup>th</sup> | 243 | 11.6±0.5 | 28±14 | 34±13 | 38                    | 11.6±0.6 | 6±4  | 24±15 | 157                       | 11.6±0.5 | 27±8 | 34±11 | 48                     | 11.7±0.5 | 48±6 | 44±12 |

**Table S5.** Percentage of children with negative (NED), no (NOD), and positive (POD) development per grade, gender, and proficiency level.

| WB  |     |     | MS  |     |     | JS  |     |     | EHC |     |     |
|-----|-----|-----|-----|-----|-----|-----|-----|-----|-----|-----|-----|
| NED | NOD | POD |

|                   |                 |       |       |       |       |       |       |       |       |       |       |       |       |
|-------------------|-----------------|-------|-------|-------|-------|-------|-------|-------|-------|-------|-------|-------|-------|
| Grade             | 3 <sup>rd</sup> | 24.1% | 18.1% | 57.9% | 33.2% | 28.0% | 38.7% | 10.2% | 47.9% | 41.9% |       |       |       |
|                   | 4 <sup>th</sup> | 28.2% | 16.4% | 55.5% | 18.2% | 29.6% | 52.1% | 13.0% | 41.2% | 45.7% |       |       |       |
|                   | 5 <sup>th</sup> | 21.2% | 14.6% | 64.2% | 17.2% | 23.5% | 59.3% | 15.3% | 34.6% | 50.1% | 9.2%  | 15.8% | 75.1% |
|                   | 6 <sup>th</sup> | 19.3% | 19.1% | 61.6% | 22.0% | 21.1% | 56.8% | 11.4% | 33.4% | 55.2% | 16.6% | 17.0% | 66.4% |
|                   | 7 <sup>th</sup> | 24.5% | 16.5% | 59.1% | 20.5% | 23.4% | 56.1% | 10.5% | 42.0% | 47.5% | 15.6% | 18.6% | 65.8% |
|                   | 8 <sup>th</sup> | 26.6% | 19.3% | 54.1% | 18.2% | 23.7% | 58.1% | 12.4% | 43.7% | 43.9% | 19.3% | 15.7% | 65.0% |
| Gender            | Boys            | 23.3% | 17.5% | 59.3% | 20.9% | 23.3% | 55.8% | 13.7% | 38.3% | 48.0% | 16.3% | 15.1% | 68.5% |
|                   | Girls           | 24.6% | 17.1% | 58.2% | 21.7% | 26.2% | 52.1% | 10.7% | 42.3% | 47.0% | 14.3% | 18.3% | 67.4% |
| Proficiency level | Low scores      | 6.6%  | 11.1% | 82.2% | 9.1%  | 16.1% | 74.8% | 5.3%  | 32.1% | 62.6% | 0.7%  | 20.7% | 78.7% |
|                   | Average scores  | 22.3% | 18.1% | 59.6% | 19.4% | 24.6% | 56.0% | 10.9% | 40.3% | 48.8% | 13.1% | 14.9% | 72.0% |
|                   | High scores     | 46.0% | 20.0% | 34.0% | 37.2% | 32.3% | 30.5% | 23.1% | 48.1% | 28.8% | 35.0% | 19.9% | 45.1% |

WB: walking backwards; MS: moving sideways; JS: jumping sideways; EHC: eye-hand coordination.
